# Supplementary material for: Selective SERCA2a activator as a candidate for chronic heart failure therapy
Source: Springer Nature journal article supplement (doi:10.1186/s12967-024-04874-9), 2024-01-19
Supplement: MOESM1 [file 26643500]

## SUPPORTING INFORMATION

“Selective SERCA2a activator as a candidate for chronic heart failure therapy” by Arici M & Shih-Che Hsu et al.

### Index

|                                                                                                                                      |          |
|--------------------------------------------------------------------------------------------------------------------------------------|----------|
| Supplementary Methods                                                                                                                | pp. 2-3  |
| Supplementary Figures and Tables:                                                                                                    | pp. 4-13 |
| Figure S1: Protocol to evaluate intracellular Ca <sup>2+</sup> dynamics in patch-clamped cells under Na <sup>+</sup> free condition; | p. 4     |
| Figure S2: Protocol outline for oral treatment of STZ rats with compound 8 at 40 mg/kg or 80 mg/kg vs control group (saline);        | p. 5     |
| Figure S3: <i>In vivo</i> effects during i.v. infusion in STZ rats;                                                                  | p. 6     |
| Figure S4: <i>In vivo</i> effects following oral treatment in STZ rats (40mg/kg compound 8);                                         | p. 7     |
| Figure S5: <i>In vivo</i> effects following oral treatment in STZ rats (80mg/kg compound 8).                                         | p. 8     |
| <br>                                                                                                                                 |          |
| Table S1: Effect of compound 8 (10 μM) on the panel of molecular targets;                                                            | pp. 9-10 |
| Table S2-S3-S4: Echocardiographic and tissue Doppler parameters in STZ rats (raw data).                                              | p. 11-13 |
| <br>                                                                                                                                 |          |
| References                                                                                                                           | p. 14    |

## Supplementary Methods

### *Animal models*

Male Sprague Dawley (SD) rats (150-175 gr) were used to generate STZ-induced diabetic cardiomyopathy model to test compounds *in vivo* and *in vitro*; female Dunkin-Hartley guinea pigs (175-200 g) were used for I-clamp measurements in ventricular myocytes and finally, male Albino Swiss CD1 mice (30 g) were used for acute *in vivo* toxicity.

### *In-vitro effects for ligands potentially accounting for off-target actions*

Analysis of compound 8 interaction with a panel of 50 ligands was carried out by Eurofins (Taiwan) on crude membrane preparations according to Eurofins described procedures. The assay is partly based on radioligand displacement (e.g. for receptors) and partly on spectrophotometric detection of change in function (e.g. for enzymes). Results were compared to appropriate reference standards; a >50% change in affinity or activity was considered as a positive hit (interaction present).

### *Measurements in isolated ventricular myocytes*

Rat and guinea-pig LV ventricular myocytes were isolated by using a retrograde coronary perfusion method previously published (Rocchetti et al., 2003) with minor modifications. Rod-shaped, Ca<sup>2+</sup>-tolerant myocytes were used within 12 h from dissociation. LV myocytes were clamped in the whole-cell configuration (Axopatch 200A, Axon Instruments Inc., Union City, CA). During measurements, myocytes were superfused at 2 ml/min with Tyrode's solution containing 154 mM NaCl, 4 mM KCl, 2 mM CaCl<sub>2</sub>, 1 mM MgCl<sub>2</sub>, 5 mM HEPES/NaOH, and 5.5 mM D-glucose, adjusted to pH 7.35. A thermostated manifold, allowing for fast (electronically timed) solution switch, was used for cell superfusion. All measurements were performed at 35 °C. The pipette solution contained 110 mM K<sup>+</sup> - aspartate, 23 mM KCl, 0.2 mM CaCl<sub>2</sub> (10<sup>-7</sup> M calculated free-Ca<sup>2+</sup> concentration), 3 mM MgCl<sub>2</sub>, 5 mM HEPES-KOH, 0.5 mM EGTA-KOH, 0.4 mM GTP-Na<sup>+</sup> salt, 5 mM ATP-Na<sup>+</sup> salt, and 5 mM creatine phosphate Na<sup>+</sup> salt, pH 7.3. Membrane capacitance and series resistance were measured in every cell but left uncompensated. Current signals were filtered at 2 KHz and digitized at 5 KHz (Axon Digidata 1200). Trace acquisition and analysis was controlled by dedicated software (Axon pClamp 8.0).

Na<sup>+</sup>/K<sup>+</sup> ATPase current (I<sub>NaK</sub>) measurements. I<sub>NaK</sub> was recorded in isolated rat LV myocytes (Rocchetti et al., 2003; Alemanni et al., 2011) as the holding current recorded at -40 mV in the presence of Ni<sup>2+</sup> (5 mM), nifedipine (5 μM), Ba<sup>2+</sup> (1 mM) and 4-aminopyridine (2 mM) to minimize contamination by changes in Na<sup>+</sup>/Ca<sup>2+</sup> exchanger (NCX), Ca<sup>2+</sup> and K<sup>+</sup> currents, respectively. Tetraethylammonium-Cl (20 mM) and EGTA (5 mM) were added to the pipette solution and intracellular K<sup>+</sup> was replaced by Cs<sup>+</sup>. To optimize the recording conditions, I<sub>NaK</sub> was enhanced by increasing intracellular Na<sup>+</sup> (10 mM) and extracellular K<sup>+</sup> (5.4 mM). All drugs were dissolved in dimethyl sulfoxide (DMSO). Control and test solutions contained maximum 1:100 DMSO.

Intracellular Ca<sup>2+</sup> dynamics. LV myocytes were incubated in Tyrode's solution for 30 min with the membrane-permeant form of the dye, Fluo4-AM (10 μM), and then washed for 15 min to allow dye de-esterification. Fluo4 emission was collected through a 535 nm band pass filter, converted to voltage, low-pass filtered (100 Hz) and digitized at 2 kHz after further low-pass digital filtering (FFT, 50 Hz). After subtraction of background luminescence, a reference fluorescence (F<sub>0</sub>) value was used for signal normalization (F/F<sub>0</sub>). Cytosolic Ca<sup>2+</sup> activity was dynamically measured in field stimulated (2 Hz) and

patch-clamped rat LV myocytes. In the first case, fluorescence in diastole was used as  $F_0$  for signal normalization ( $F/F_0$ ).

In patch-clamped myocytes membrane current, whose time-dependent component mainly reflected the sarcolemmal  $Ca^{2+}$  current ( $I_{CaL}$ ), was simultaneously recorded. Drug effects on SR  $Ca^{2+}$  uptake rate were evaluated with a “SR loading protocol” specifically devised to rule out the contribution of NCX and to assess the SR  $Ca^{2+}$  uptake rate at multiple levels of SR  $Ca^{2+}$  loading (Rocchetti et al., 2005) (protocol in Figure S1). The protocol consisted in emptying the SR by a brief caffeine (10 mM) pulse and then progressively refilling it by 7-10 voltage steps (-35 to 0 mV) activating  $Ca^{2+}$  influx through  $I_{CaL}$ . NCX was blocked by omission of  $Na^+$  from intracellular and extracellular (replaced by equimolar  $Li^+$  and 1 mM EGTA) solutions. The procedure is in agreement with published methods, with minor modifications (Rocchetti et al., 2005; Alemanni et al., 2011; Torre et al., 2022). Multiple parameters, suitable to quantify SR  $Ca^{2+}$  uptake, can be extracted from  $Ca^{2+}$  and  $I_{CaL}$  response to the protocol: the time constant ( $\tau$ ) of cytosolic  $Ca^{2+}$  decay within each V-step largely reflects net  $Ca^{2+}$  flux across the SR membrane (the faster SR  $Ca^{2+}$  uptake, the smaller  $\tau$  decay). Because of the steep dependency of  $Ca_T$  amplitude on SR  $Ca^{2+}$  content, the rate at which  $Ca_T$  amplitude increases across the subsequent pulses of the protocol reflects the rate at which the SR refills. To rule out the potential contribution of changes in  $I_{CaL}$ , in each loading step,  $Ca_T$  amplitude was normalized to  $Ca^{2+}$  influx (estimated from  $I_{CaL}$  integral up to  $Ca_T$  peak) to obtain excitation-release (ER) gain. As expected from its strong dependency on SR  $Ca^{2+}$  content, this parameter progressively increases during the loading protocol. Diastolic  $Ca^{2+}$  of the first step was used as  $F_0$  for signal normalization ( $F/F_0$ ). Specificity of the “loading protocol” parameters in detecting SERCA2a activation is supported by the observation that they did not detect any effect of digoxin, an inotropic agent blocking the  $Na^+/K^+$  pump and devoid of SERCA2a stimulating effect (Rocchetti et al., 2005; Alemanni et al., 2011).

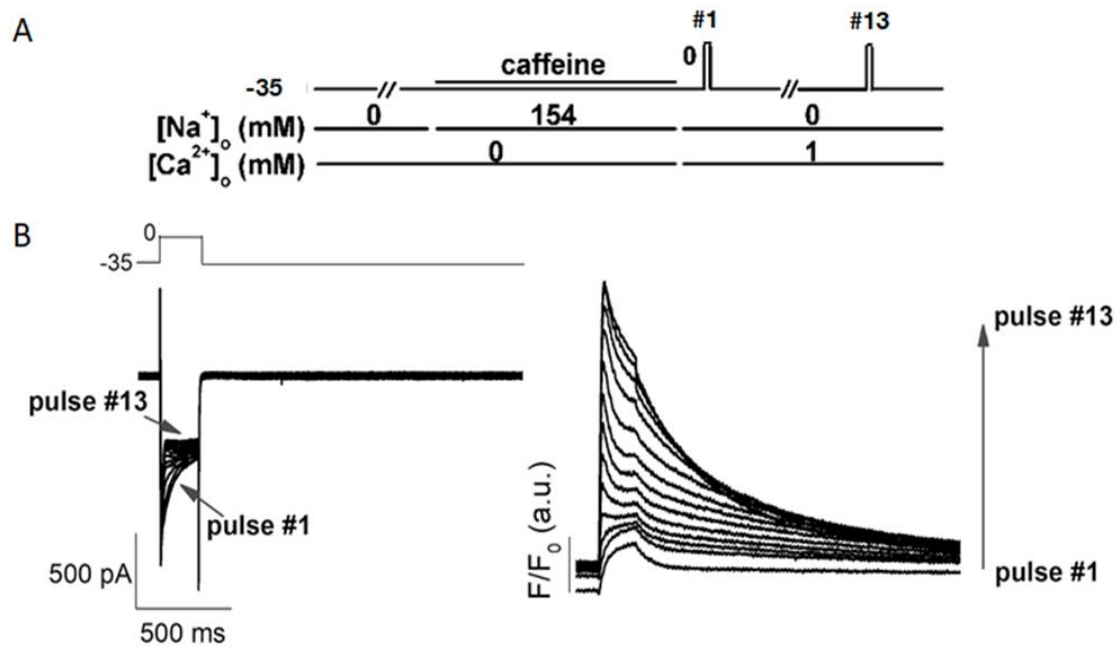

**Figure S1. Protocol to evaluate intracellular Ca<sup>2+</sup> dynamics in patch-clamped cells under Na<sup>+</sup> free condition. A) Protocol outline. B) Transmembrane current (left) and Ca<sup>2+</sup> transients (right) recordings during SR reloading after caffeine-induced SR depletion in patch-clamped cells. See Methods for details.**

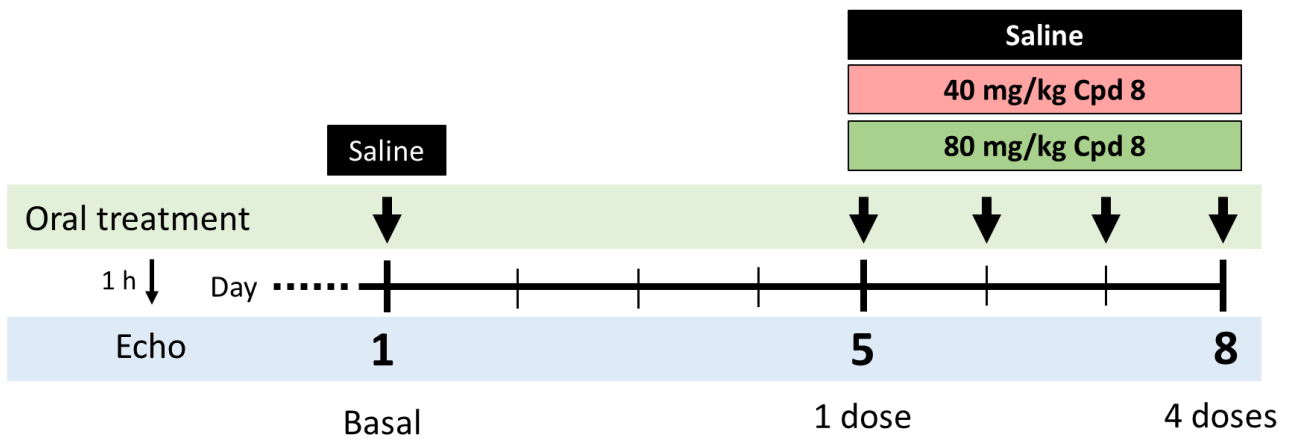

**Figure S2. Protocol outline for oral treatment of STZ rats with compound 8 at 40 mg/kg or 80 mg/kg vs control group (saline).** At day 1 rats were randomly assigned to either control and drug-treated groups; all the animals received saline by oral gavage and they were subjected to basal echocardiography. From day 5 to day 8, each group of rats was orally treated once daily with saline or compound 8 (40 mg/kg or 80 mg/kg); all animals were subjected to echocardiography at day 5 (1 dose) and day 8 (4 doses). Echo measurements were performed 1h following treatment under ketamine/pentobarbital anesthesia (60-37.5 mg/kg, i.p.) to permit the recovery of the animals after each experimental echocardiographic session.

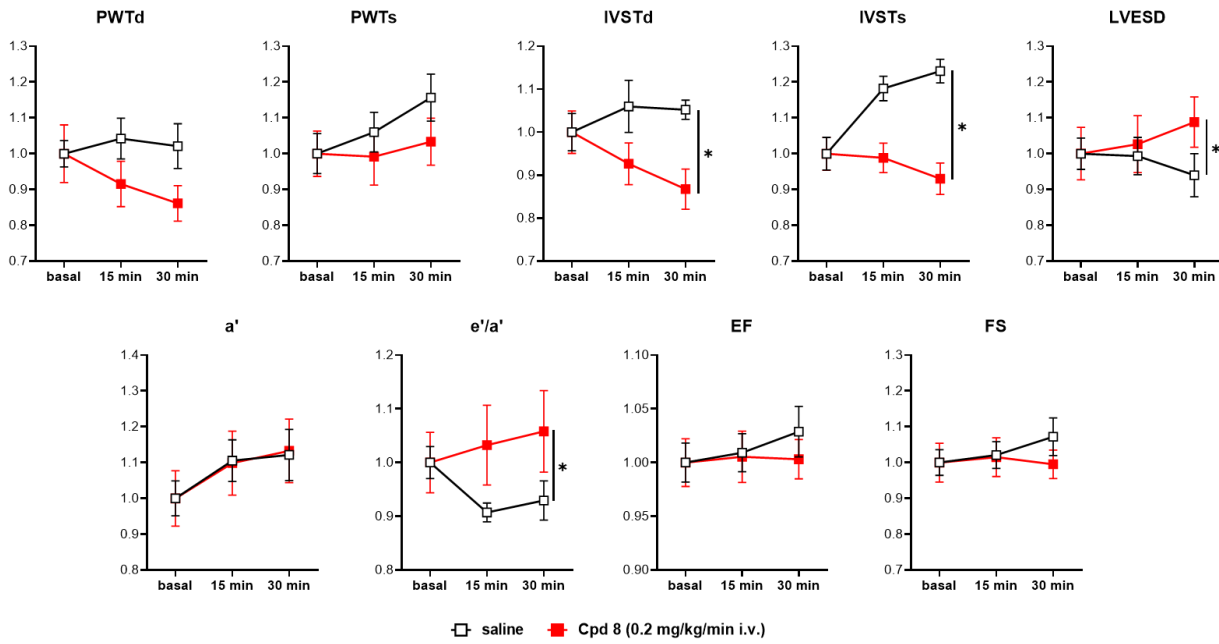

**Figure S3. *In vivo* effects during i.v. infusion in STZ rats.** Compound 8 was i.v. infused at 0.2 mg/kg/min under urethane anesthesia, in rats 8 weeks after STZ treatment. Echocardiographic parameters were measured under basal condition, and at 15 and 30 minutes during drug infusion. Data are mean  $\pm$  SEM. Saline group N=8, compound 8 group N=11; \* $p$ <0.05 vs saline group for the interaction factor in RM two-way ANOVA. PWTd, PWTs: posterior wall thickness in diastole or systole, IVSTd, IVSTs: interventricular septum thickness in diastole or systole, LVESD: LV end-systolic diameter, a', e': late and early diastolic mitral annulus velocity; EF: ejection fraction; FS: fractional shortening. See Figure 5 of the main text for the other echo parameters.

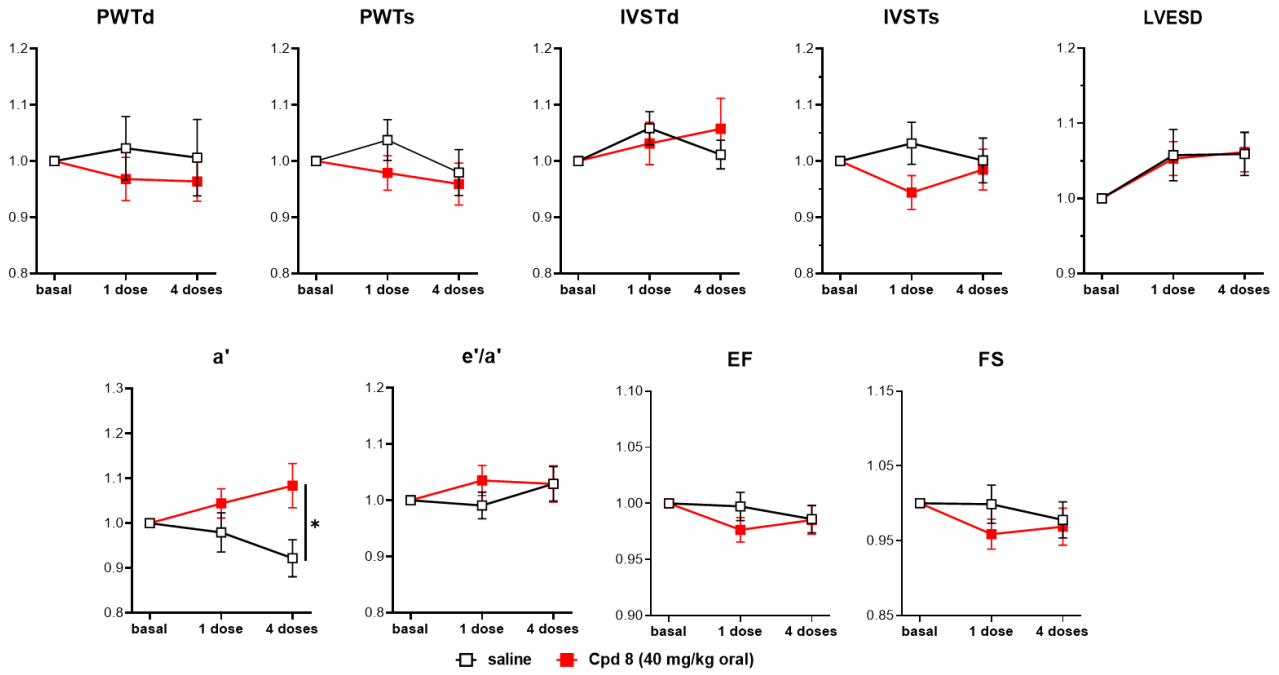

**Figure S4. *In vivo* effects following oral treatment in STZ rats (40mg/kg compound 8).** Rats were treated with 1 or 4 oral daily doses of compound 8 (40 mg/kg) or saline, accordingly to the protocol shown in Figure S2. Echocardiographic parameters were measured in each group 60 min post treatment under ketamine/pentobarbital anesthesia; each measurement was normalized to its basal value to highlight changes between experimental groups. Data are mean  $\pm$  SEM; saline N=21, 40 mg/kg compound 8 N=22. \* $p < 0.05$  vs saline group for the interaction factor in RM two-way ANOVA. PWTd, PWTs: posterior wall thickness in diastole or systole, IVSTd, IVSTs: interventricular septum thickness in diastole or systole, LVESD: LV end-systolic diameter, a', e': late and early diastolic mitral annulus velocity; EF: ejection fraction; FS: fractional shortening. See Figure 6 of the main text for the other echo parameters.

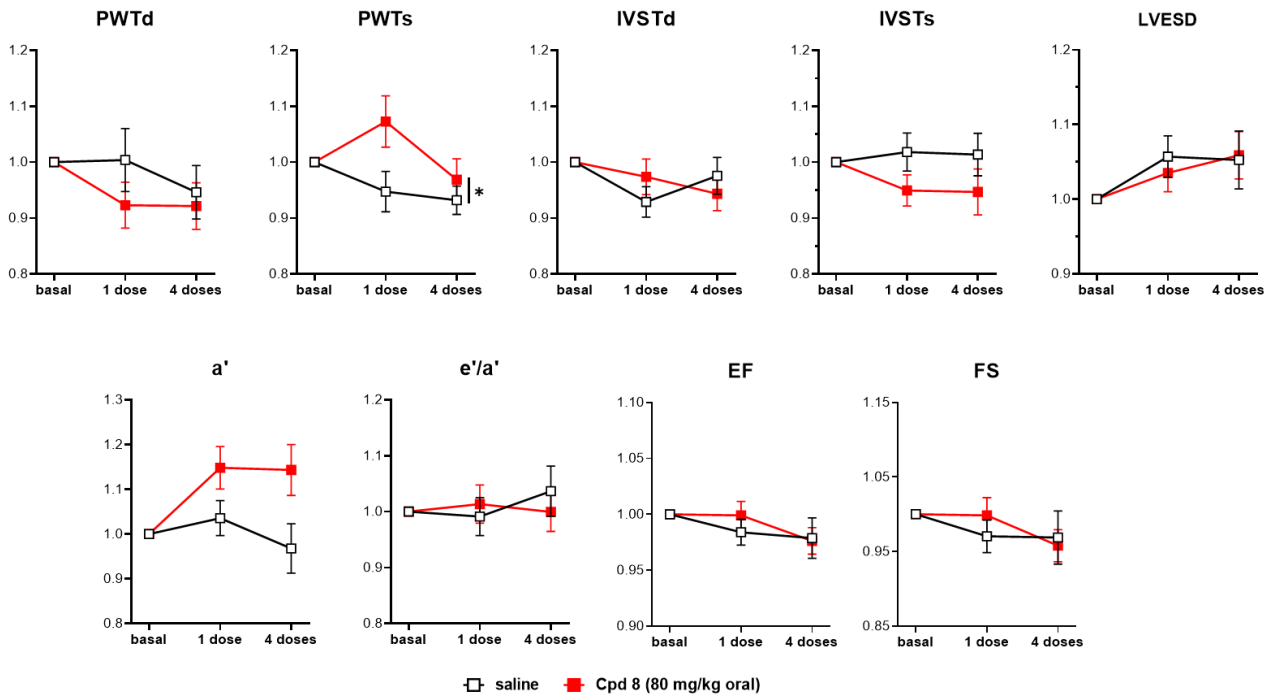

**Figure S5. *In vivo* effects following oral treatment in STZ rats (80mg/kg compound 8).** Rats were treated with 1 or 4 oral daily doses of compound 8 (80 mg/kg) or saline, accordingly to the protocol shown in Figure S2. Echocardiographic parameters were measured in each group 60 min post treatment under ketamine/pentobarbital anesthesia; each measurement was normalized to its basal value to highlight changes between experimental groups. Data are mean  $\pm$  SEM; saline N=19, 80 mg/kg compound 8 N=21. \* $p < 0.05$  vs saline group for the interaction factor in RM two-way ANOVA. PWTd, PWTs: posterior wall thickness in diastole or systole, IVSTd, IVSTs: interventricular septum thickness in diastole or systole, LVESD: LV end-systolic diameter, a', e': late and early diastolic mitral annulus velocity; EF: ejection fraction; FS: fractional shortening. See Figure 7 of the main text for the other echo parameters.



**Table S1.** Effect of compound 8 (10  $\mu$ M) on a panel of molecular targets (Eurofins, Taiwan). Data are reported as  $\Delta\%$  effect (inhibition or activation).

| Cat #  | Assay name                                 | Batch  | Species | Cpd 8 effect ( $\Delta\%$ ) |
|--------|--------------------------------------------|--------|---------|-----------------------------|
| 107480 | ATPase, Ca <sup>2+</sup> , skeletal muscle | 438642 | pig     | -1                          |
| 118040 | CYP450, 19                                 | 438644 | human   | 0                           |
| 124010 | HMG-CoA Reductase                          | 438610 | human   | -4                          |
| 140010 | Monoamine Oxidase MAO-A                    | 438645 | human   | 1                           |
| 140120 | Monoamine Oxidase MAO-B                    | 438647 | human   | -2                          |
| 143000 | Nitric Oxide Synthase, Endothelial (eNOS)  | 438568 | bovine  | 2                           |
| 107300 | Peptidase, Angiotensin Converting Enzyme   | 438641 | rabbit  | 7                           |
| 164610 | Peptidase, Renin                           | 438648 | human   | 7                           |
| 152000 | Phosphodiesterase PDE3                     | 438611 | human   | -25                         |
| 171601 | Protein Tyrosine Kinase, ABL1              | 438612 | human   | 13                          |
| 176810 | Protein Tyrosine Kinase, Src               | 438613 | human   | 2                           |
| 200510 | Adenosine A1                               | 438614 | human   | -1                          |
| 200610 | Adenosine A2A                              | 438614 | human   | -1                          |
| 203100 | Adrenergic $\alpha$ 1A                     | 438615 | rat     | 5                           |
| 203200 | Adrenergic $\alpha$ 1B                     | 438615 | rat     | 6                           |
| 203630 | Adrenergic $\alpha$ 2A                     | 438616 | human   | -2                          |
| 204010 | Adrenergic $\beta$ 1                       | 438652 | human   | 2                           |
| 204110 | Adrenergic $\beta$ 2                       | 438571 | human   | -6                          |
| 204600 | Aldosterone                                | 438617 | rat     | -3                          |
| 206000 | Androgen (Testosterone)                    | 438618 | human   | 6                           |
| 210030 | Angiotensin AT1                            | 438653 | human   | 1                           |
| 210120 | Angiotensin AT2                            | 438653 | human   | -6                          |
| 214600 | Calcium Channel L-type, Dihydropyridine    | 438620 | rat     | -20                         |
| 219500 | Dopamine D1                                | 438660 | human   | 13                          |
| 219700 | Dopamine D2s                               | 439024 | human   | -4                          |
| 219800 | Dopamine D3                                | 438660 | human   | 0                           |
| 226010 | Estrogen ER $\alpha$                       | 438622 | human   | -3                          |

|        |                                                      |        |         |     |
|--------|------------------------------------------------------|--------|---------|-----|
| 226050 | Estrogen ER $\beta$                                  | 438622 | hum     | -6  |
| 226600 | GABA <sub>A</sub> , Flunitrazepam, Central           | 438624 | rat     | 1   |
| 226500 | GABA <sub>A</sub> , Muscimol, Central                | 438623 | rat     | 2   |
| 232030 | Glucocorticoid                                       | 438626 | human   | -9  |
| 233000 | Glutamate, NMDA, Phencyclidine                       | 438627 | rat     | -7  |
| 239610 | Histamine H1                                         | 438628 | human   | 12  |
| 241000 | Imidazoline I2, Central                              | 438629 | rat     | 1   |
| 243000 | Insulin                                              | 438654 | rat     | 4   |
| 252710 | Muscarinic M2                                        | 438621 | human   | -20 |
| 252810 | Muscarinic M3                                        | 438661 | human   | -6  |
| 253010 | Muscarinic M5                                        | 438661 | human   | 0   |
| 258730 | Nicotinic Acetylcholine $\alpha 3\beta 4$            | 438656 | human   | -3  |
| 260410 | Opiate $\mu$ (OP3, MOP)                              | 438616 | human   | 11  |
| 264500 | Phorbol Ester                                        | 438624 | mouse   | -7  |
| 265600 | Potassium Channel (K <sub>ATP</sub> )                | 438632 | hamster | -11 |
| 265900 | Potassium Channel hERG                               | 438633 | human   | 0   |
| 299005 | Progesterone PR-B                                    | 438638 | human   | 1   |
| 270300 | Ryanodine RyR3                                       | 438634 | rat     | -10 |
| 271010 | Serotonin (5-Hydroxytryptamine) 5-HT1, non-selective | 438668 | rat     | 12  |
| 299007 | Sigma $\sigma 2$                                     | 438662 | human   | 4   |
| 278110 | Sigma $\sigma 1$                                     | 438636 | human   | 2   |
| 279510 | Sodium Channel, Site 2                               | 438637 | rat     | -5  |
| 204410 | Transporter, Norepinephrine (NET)                    | 438597 | human   | -4  |

**Table S2.** Echocardiographic and tissue Doppler parameters in STZ rats at basal, after i.v. administrations of saline or compound 8 at 0.2 mg/kg/min. Raw echo parameters measured after 15 and 30 min from treatment start under urethane anesthesia. Data are mean  $\pm$  SEM, N=number of rats. Statistical analysis is reported in Figures 5 and S3.

|                          |                          | Saline           |                  |                  | Cpd 8 (0.2 mg/kg/min) |                  |                  |
|--------------------------|--------------------------|------------------|------------------|------------------|-----------------------|------------------|------------------|
|                          |                          | Basal            | 15 min           | 30 min           | Basal                 | 15 min           | 30 min           |
| Morphometric parameters  | IVSTd, mm                | 1,68 $\pm$ 0,07  | 1,78 $\pm$ 0,10  | 1,76 $\pm$ 0,04  | 1,85 $\pm$ 0,09       | 1,72 $\pm$ 0,09  | 1,61 $\pm$ 0,09  |
|                          | PWTd, mm                 | 1,19 $\pm$ 0,04  | 1,24 $\pm$ 0,07  | 1,21 $\pm$ 0,07  | 1,18 $\pm$ 0,10       | 1,08 $\pm$ 0,07  | 1,02 $\pm$ 0,06  |
|                          | LVEDD, mm                | 7,53 $\pm$ 0,09  | 7,66 $\pm$ 0,13  | 7,68 $\pm$ 0,14  | 6,95 $\pm$ 0,11       | 7,22 $\pm$ 0,13  | 7,47 $\pm$ 0,16  |
|                          | IVSTs, mm                | 2,26 $\pm$ 0,09  | 2,44 $\pm$ 0,07  | 2,54 $\pm$ 0,07  | 2,35 $\pm$ 0,11       | 2,32 $\pm$ 0,10  | 2,18 $\pm$ 0,10  |
|                          | PWTs, mm                 | 2,08 $\pm$ 0,12  | 2,20 $\pm$ 0,12  | 2,40 $\pm$ 0,14  | 2,17 $\pm$ 0,14       | 2,15 $\pm$ 0,17  | 2,25 $\pm$ 0,14  |
|                          | LVEDS, mm                | 3,74 $\pm$ 0,16  | 3,71 $\pm$ 0,20  | 3,51 $\pm$ 0,23  | 3,10 $\pm$ 0,23       | 3,18 $\pm$ 0,25  | 3,37 $\pm$ 0,22  |
| Systolic function        | FS, %                    | 50,63 $\pm$ 1,82 | 51,70 $\pm$ 1,89 | 54,29 $\pm$ 2,65 | 55,45 $\pm$ 3,01      | 56,30 $\pm$ 3,00 | 55,19 $\pm$ 2,21 |
|                          | s', mm/s                 | 22,24 $\pm$ 0,40 | 22,76 $\pm$ 0,66 | 22,88 $\pm$ 0,69 | 21,83 $\pm$ 1,09      | 24,47 $\pm$ 0,74 | 22,68 $\pm$ 0,96 |
|                          | EF, %                    | 85,96 $\pm$ 1,56 | 86,75 $\pm$ 1,52 | 88,43 $\pm$ 2,02 | 88,68 $\pm$ 1,97      | 89,16 $\pm$ 2,12 | 88,96 $\pm$ 1,61 |
| Diastolic function       | E, mm/s                  | 0,78 $\pm$ 0,05  | 0,82 $\pm$ 0,04  | 0,86 $\pm$ 0,05  | 0,84 $\pm$ 0,05       | 0,90 $\pm$ 0,04  | 0,87 $\pm$ 0,03  |
|                          | A, mm/s                  | 0,56 $\pm$ 0,05  | 0,64 $\pm$ 0,05  | 0,66 $\pm$ 0,05  | 0,56 $\pm$ 0,04       | 0,66 $\pm$ 0,05  | 0,68 $\pm$ 0,04  |
|                          | E/A                      | 1,41 $\pm$ 0,08  | 1,32 $\pm$ 0,07  | 1,32 $\pm$ 0,07  | 1,59 $\pm$ 0,12       | 1,42 $\pm$ 0,08  | 1,33 $\pm$ 0,08  |
|                          | DT, ms                   | 60,25 $\pm$ 3,17 | 57,63 $\pm$ 2,38 | 58,88 $\pm$ 2,23 | 58,46 $\pm$ 3,37      | 49,73 $\pm$ 3,79 | 47,46 $\pm$ 3,07 |
|                          | DT/E, s <sup>2</sup> /mm | 79,07 $\pm$ 5,25 | 71,18 $\pm$ 4,46 | 70,29 $\pm$ 4,98 | 71,90 $\pm$ 5,83      | 56,52 $\pm$ 4,96 | 54,80 $\pm$ 3,87 |
|                          | E/DT, mm/s <sup>2</sup>  | 13,02 $\pm$ 0,82 | 14,46 $\pm$ 0,94 | 14,86 $\pm$ 1,30 | 15,51 $\pm$ 2,10      | 19,79 $\pm$ 2,49 | 19,38 $\pm$ 1,63 |
|                          | e', mm/s                 | 21,14 $\pm$ 0,78 | 21,27 $\pm$ 0,95 | 21,84 $\pm$ 0,82 | 20,71 $\pm$ 0,57      | 23,1 $\pm$ 0,59  | 24,48 $\pm$ 0,63 |
|                          | a', mm/s                 | 25,48 $\pm$ 1,25 | 28,16 $\pm$ 1,48 | 28,56 $\pm$ 1,82 | 23,54 $\pm$ 1,82      | 25,86 $\pm$ 2,10 | 26,66 $\pm$ 2,09 |
|                          | e'/a'                    | 0,84 $\pm$ 0,02  | 0,75 $\pm$ 0,01  | 0,78 $\pm$ 0,03  | 0,92 $\pm$ 0,05       | 0,95 $\pm$ 0,07  | 0,97 $\pm$ 0,07  |
| E/e'                     | 36,66 $\pm$ 1,56         | 38,94 $\pm$ 1,67 | 39,36 $\pm$ 1,58 | 40,66 $\pm$ 1,65 | 39,08 $\pm$ 1,52      | 35,82 $\pm$ 1,18 |                  |
| Overall cardiac function | HR, bpm                  | 230,5 $\pm$ 7,4  | 231 $\pm$ 7,4    | 235 $\pm$ 11,1   | 223,1 $\pm$ 18,3      | 221,9 $\pm$ 15,1 | 224,6 $\pm$ 15,0 |
|                          | SV, ml                   | 0,82 $\pm$ 0,03  | 0,87 $\pm$ 0,03  | 0,89 $\pm$ 0,04  | 0,68 $\pm$ 0,03       | 0,76 $\pm$ 0,04  | 0,83 $\pm$ 0,04  |
|                          | CO                       | 189 $\pm$ 9,2    | 200,5 $\pm$ 9,4  | 208 $\pm$ 12,8   | 149,4 $\pm$ 10,1      | 165,5 $\pm$ 9,3  | 181,8 $\pm$ 7,2  |
|                          | N                        | 8                | 8                | 8                | 11                    | 11               | 11               |

**Table S3.** Echocardiographic and tissue Doppler parameters in STZ rats after 1 or 4 oral daily administrations of saline or compound 8 at 40 mg/kg. Raw echo parameters measured after 60 min from treatment start under ketamine/pentobarbital anesthesia. Data are mean  $\pm$  SEM, N=number of rats. Statistical analysis is reported in Figures 6 and S4.

|                          |                          | Saline           |                  |                  | Cpd 8 (40 mg/kg) |                  |                  |
|--------------------------|--------------------------|------------------|------------------|------------------|------------------|------------------|------------------|
|                          |                          | Basal            | 1 dose           | 4 doses          | Basal            | 1 dose           | 4 doses          |
| Morphometric parameters  | IVSTd, mm                | 1,61 $\pm$ 0,05  | 1,69 $\pm$ 0,05  | 1,63 $\pm$ 0,04  | 1,57 $\pm$ 0,05  | 1,6 $\pm$ 0,04   | 1,63 $\pm$ 0,04  |
|                          | PWTd, mm                 | 1,03 $\pm$ 0,04  | 1,03 $\pm$ 0,04  | 1,02 $\pm$ 0,05  | 1,03 $\pm$ 0,03  | 0,99 $\pm$ 0,04  | 0,98 $\pm$ 0,03  |
|                          | LVEDD, mm                | 7,85 $\pm$ 0,14  | 8,13 $\pm$ 0,13  | 8,09 $\pm$ 0,12  | 8,30 $\pm$ 0,11  | 8,38 $\pm$ 0,09  | 8,42 $\pm$ 0,11  |
|                          | IVSTs, mm                | 2,10 $\pm$ 0,07  | 2,14 $\pm$ 0,06  | 2,10 $\pm$ 0,07  | 2,19 $\pm$ 0,08  | 2,04 $\pm$ 0,06  | 2,13 $\pm$ 0,08  |
|                          | PWTs, mm                 | 1,77 $\pm$ 0,06  | 1,81 $\pm$ 0,06  | 1,73 $\pm$ 0,07  | 1,79 $\pm$ 0,05  | 1,74 $\pm$ 0,06  | 1,70 $\pm$ 0,07  |
|                          | LVESD, mm                | 4,08 $\pm$ 0,13  | 4,26 $\pm$ 0,12  | 4,28 $\pm$ 0,13  | 4,44 $\pm$ 0,10  | 4,65 $\pm$ 0,09  | 4,67 $\pm$ 0,10  |
| Systolic function        | FS, %                    | 48,15 $\pm$ 1,04 | 47,77 $\pm$ 1,02 | 46,95 $\pm$ 1,21 | 46,57 $\pm$ 0,93 | 44,45 $\pm$ 0,89 | 44,75 $\pm$ 0,79 |
|                          | s', mm/s                 | 21,37 $\pm$ 0,54 | 20,76 $\pm$ 0,55 | 20,70 $\pm$ 0,57 | 20,72 $\pm$ 0,39 | 21,2 $\pm$ 0,44  | 21,57 $\pm$ 0,42 |
|                          | EF, %                    | 83,85 $\pm$ 0,89 | 83,47 $\pm$ 0,83 | 82,64 $\pm$ 1,05 | 82,39 $\pm$ 0,85 | 80,36 $\pm$ 0,89 | 80,95 $\pm$ 0,66 |
| Diastolic function       | E, mm/s                  | 0,95 $\pm$ 0,03  | 0,91 $\pm$ 0,02  | 0,86 $\pm$ 0,03  | 0,85 $\pm$ 0,02  | 0,87 $\pm$ 0,03  | 0,92 $\pm$ 0,03  |
|                          | A, mm/s                  | 0,78 $\pm$ 0,04  | 0,72 $\pm$ 0,03  | 0,68 $\pm$ 0,03  | 0,68 $\pm$ 0,03  | 0,71 $\pm$ 0,03  | 0,76 $\pm$ 0,03  |
|                          | E/A                      | 1,27 $\pm$ 0,05  | 1,30 $\pm$ 0,04  | 1,29 $\pm$ 0,04  | 1,28 $\pm$ 0,04  | 1,24 $\pm$ 0,03  | 1,23 $\pm$ 0,03  |
|                          | DT, ms                   | 53,33 $\pm$ 2,17 | 59,48 $\pm$ 1,87 | 56,95 $\pm$ 1,78 | 57,41 $\pm$ 2,50 | 55,09 $\pm$ 2,06 | 56,14 $\pm$ 2,3  |
|                          | DT/E, s <sup>2</sup> /mm | 58,24 $\pm$ 3,89 | 66,59 $\pm$ 2,84 | 67,37 $\pm$ 2,87 | 69,03 $\pm$ 3,84 | 65,0 $\pm$ 3,58  | 63,12 $\pm$ 3,66 |
|                          | E/DT, mm/s <sup>2</sup>  | 18,88 $\pm$ 1,35 | 15,66 $\pm$ 0,76 | 15,42 $\pm$ 0,73 | 15,75 $\pm$ 1,14 | 16,62 $\pm$ 1,13 | 17,55 $\pm$ 1,61 |
|                          | e', mm/s                 | 23,29 $\pm$ 0,61 | 21,97 $\pm$ 0,49 | 21,52 $\pm$ 0,37 | 21,49 $\pm$ 0,50 | 22,8 $\pm$ 0,52  | 23,28 $\pm$ 0,57 |
|                          | a', mm/s                 | 28,54 $\pm$ 1,06 | 27,28 $\pm$ 0,93 | 25,88 $\pm$ 1,02 | 26,82 $\pm$ 0,96 | 27,8 $\pm$ 1,08  | 28,69 $\pm$ 1,23 |
|                          | e'/a'                    | 0,83 $\pm$ 0,02  | 0,81 $\pm$ 0,02  | 0,85 $\pm$ 0,03  | 0,81 $\pm$ 0,02  | 0,84 $\pm$ 0,03  | 0,83 $\pm$ 0,03  |
|                          | E/e'                     | 40,97 $\pm$ 1,05 | 41,49 $\pm$ 1,08 | 40,07 $\pm$ 1,13 | 39,75 $\pm$ 0,88 | 38,39 $\pm$ 0,98 | 39,51 $\pm$ 0,79 |
| Overall cardiac function | HR, bpm                  | 249,5 $\pm$ 12,0 | 222,2 $\pm$ 8,4  | 220,8 $\pm$ 8,3  | 221,4 $\pm$ 9,4  | 232,4 $\pm$ 8,8  | 240,6 $\pm$ 9,2  |
|                          | SV, ml                   | 0,90 $\pm$ 0,04  | 0,99 $\pm$ 0,04  | 0,96 $\pm$ 0,04  | 1,03 $\pm$ 0,04  | 1,02 $\pm$ 0,03  | 1,05 $\pm$ 0,04  |
|                          | CO                       | 221,8 $\pm$ 11,8 | 219,5 $\pm$ 11,1 | 217,7 $\pm$ 13,7 | 228 $\pm$ 12,3   | 240,0 $\pm$ 13,2 | 252,8 $\pm$ 12,1 |
|                          | N                        | 21               | 21               | 20               | 22               | 22               | 21               |

**Table S4.** Echocardiographic and tissue Doppler parameters in STZ rats after 1 or 4 oral daily administrations of saline or compound 8 at 80 mg/kg. Raw echo parameters measured after 60 min from treatment start under ketamine/pentobarbital anesthesia. Data are mean  $\pm$  SEM, N=number of rats. Statistical analysis is reported in Figures 7 and S5.

|                          |                          | Saline           |                  |                  | Cpd 8 (80 mg/kg) |                  |                  |
|--------------------------|--------------------------|------------------|------------------|------------------|------------------|------------------|------------------|
|                          |                          | Basal            | 1 dose           | 4 doses          | Basal            | 1 dose           | 4 doses          |
| Morphometric parameters  | IVSTd, mm                | 1,72 $\pm$ 0,05  | 1,58 $\pm$ 0,04  | 1,66 $\pm$ 0,05  | 1,69 $\pm$ 0,03  | 1,63 $\pm$ 0,04  | 1,58 $\pm$ 0,054 |
|                          | PWTd, mm                 | 1,06 $\pm$ 0,05  | 1,04 $\pm$ 0,05  | 0,97 $\pm$ 0,04  | 1,11 $\pm$ 0,03  | 1,01 $\pm$ 0,04  | 1,02 $\pm$ 0,05  |
|                          | LVEDD, mm                | 8,12 $\pm$ 0,12  | 8,23 $\pm$ 0,13  | 8,15 $\pm$ 0,13  | 8,38 $\pm$ 0,12  | 8,52 $\pm$ 0,10  | 8,43 $\pm$ 0,15  |
|                          | IVSTs, mm                | 2,18 $\pm$ 0,07  | 2,19 $\pm$ 0,06  | 2,18 $\pm$ 0,06  | 2,27 $\pm$ 0,07  | 2,14 $\pm$ 0,07  | 2,11 $\pm$ 0,07  |
|                          | PWTs, mm                 | 2,13 $\pm$ 0,05  | 1,99 $\pm$ 0,06  | 1,97 $\pm$ 0,06  | 2,00 $\pm$ 0,08  | 2,10 $\pm$ 0,07  | 1,93 $\pm$ 0,08  |
|                          | LVESD, mm                | 4,27 $\pm$ 0,11  | 4,47 $\pm$ 0,10  | 4,45 $\pm$ 0,15  | 4,48 $\pm$ 0,11  | 4,60 $\pm$ 0,09  | 4,67 $\pm$ 0,15  |
| Systolic function        | FS, %                    | 47,42 $\pm$ 1,03 | 45,74 $\pm$ 0,79 | 45,56 $\pm$ 1,33 | 46,56 $\pm$ 1,04 | 46,10 $\pm$ 0,69 | 44,88 $\pm$ 1,11 |
|                          | s', mm/s                 | 21,45 $\pm$ 0,46 | 21,94 $\pm$ 0,50 | 20,69 $\pm$ 0,53 | 21,24 $\pm$ 0,45 | 22,20 $\pm$ 0,3  | 22,47 $\pm$ 0,55 |
|                          | EF, %                    | 83,19 $\pm$ 0,88 | 81,73 $\pm$ 0,73 | 81,26 $\pm$ 1,22 | 82,21 $\pm$ 0,96 | 82,04 $\pm$ 0,67 | 80,71 $\pm$ 1,04 |
| Diastolic function       | E, mm/s                  | 0,91 $\pm$ 0,03  | 0,88 $\pm$ 0,03  | 0,85 $\pm$ 0,03  | 0,86 $\pm$ 0,02  | 0,95 $\pm$ 0,02  | 0,93 $\pm$ 0,03  |
|                          | A, mm/s                  | 0,68 $\pm$ 0,04  | 0,69 $\pm$ 0,03  | 0,64 $\pm$ 0,03  | 0,68 $\pm$ 0,02  | 0,77 $\pm$ 0,03  | 0,76 $\pm$ 0,04  |
|                          | E/A                      | 1,38 $\pm$ 0,05  | 1,30 $\pm$ 0,03  | 1,35 $\pm$ 0,04  | 1,29 $\pm$ 0,02  | 1,26 $\pm$ 0,03  | 1,27 $\pm$ 0,06  |
|                          | DT, ms                   | 58,68 $\pm$ 2,97 | 56,42 $\pm$ 2,89 | 57,95 $\pm$ 2,32 | 60,62 $\pm$ 2,11 | 55,86 $\pm$ 2,63 | 49,11 $\pm$ 2,58 |
|                          | DT/E, s <sup>2</sup> /mm | 66,78 $\pm$ 4,63 | 65,00 $\pm$ 3,65 | 69,65 $\pm$ 3,44 | 70,52 $\pm$ 2,26 | 60,21 $\pm$ 3,52 | 54,60 $\pm$ 3,70 |
|                          | E/DT, mm/s <sup>2</sup>  | 16,80 $\pm$ 1,58 | 16,61 $\pm$ 1,27 | 15,09 $\pm$ 0,88 | 14,57 $\pm$ 0,64 | 18,57 $\pm$ 1,76 | 20,35 $\pm$ 1,91 |
|                          | e', mm/s                 | 23,85 $\pm$ 0,75 | 23,82 $\pm$ 0,48 | 22,71 $\pm$ 0,68 | 22,06 $\pm$ 0,47 | 25,04 $\pm$ 0,59 | 24,63 $\pm$ 0,92 |
|                          | a', mm/s                 | 27,74 $\pm$ 1,27 | 28,20 $\pm$ 1,04 | 25,96 $\pm$ 1,15 | 26,50 $\pm$ 0,92 | 29,86 $\pm$ 0,86 | 30,18 $\pm$ 1,46 |
|                          | e'/a'                    | 0,87 $\pm$ 0,02  | 0,86 $\pm$ 0,03  | 0,90 $\pm$ 0,03  | 0,84 $\pm$ 0,02  | 0,85 $\pm$ 0,02  | 0,83 $\pm$ 0,02  |
|                          | E/e'                     | 38,38 $\pm$ 0,92 | 37,23 $\pm$ 1,17 | 37,80 $\pm$ 1,53 | 39,23 $\pm$ 0,66 | 38,09 $\pm$ 0,82 | 37,99 $\pm$ 1,07 |
| Overall cardiac function | HR, bpm                  | 232,2 $\pm$ 12,8 | 230,1 $\pm$ 11,5 | 236,6 $\pm$ 10,7 | 229,1 $\pm$ 9,8  | 248,1 $\pm$ 10,1 | 262,3 $\pm$ 11,6 |
|                          | SV, ml                   | 0,98 $\pm$ 0,04  | 1,00 $\pm$ 0,04  | 0,97 $\pm$ 0,04  | 1,06 $\pm$ 0,04  | 1,10 $\pm$ 0,04  | 1,05 $\pm$ 0,04  |
|                          | CO                       | 224,2 $\pm$ 12,0 | 226,9 $\pm$ 12,0 | 228,6 $\pm$ 13,7 | 241 $\pm$ 13     | 271 $\pm$ 11     | 274 $\pm$ 15     |
|                          | N                        | 19               | 19               | 19               | 21               | 21               | 18               |

## References

- Alemanni, M., Rocchetti, M., Re, D., and Zaza, A. (2011). Role and mechanism of subcellular Ca<sup>2+</sup> distribution in the action of two inotropic agents with different toxicity. *J. Mol. Cell. Cardiol.* *50*: 910–918.
- Rocchetti, M., Besana, A., Mostacciuolo, G., Ferrari, P., Micheletti, R., and Zaza, A. (2003). Diverse toxicity associated with cardiac Na<sup>+</sup>/K<sup>+</sup> pump inhibition: Evaluation of electrophysiological mechanisms. *J. Pharmacol. Exp. Ther.* *305*: 765–771.
- Rocchetti, M., Besana, A., Mostacciuolo, G., Micheletti, R., Ferrari, P., Sarkozi, S., et al. (2005). Modulation of sarcoplasmic reticulum function by Na<sup>+</sup>/K<sup>+</sup> + pump inhibitors with different toxicity: Digoxin and PST2744 [(E,Z)-3-((2-aminoethoxy)imino)androstane-6,17-dione hydrochloride]. *J. Pharmacol. Exp. Ther.* *313*: 207–215.
- Torre, E., Arici, M., Lodrini, A.M., Ferrandi, M., Barassi, P., Hsu, S.-C., et al. (2022). SERCA2a stimulation by istaroxime improves intracellular Ca<sup>2+</sup> handling and diastolic dysfunction in a model of diabetic cardiomyopathy. *Cardiovasc. Res.* *118*: 1020–1032.
